# Supplementary material for: High-temperature ternary Cu–Si–Al alloy as a core–shell microencapsulated phase change material: fabrication via dry synthesis method and its thermal stability mechanism
Source: Royal Society of Chemistry journal article supplement (doi:10.1039/d3ma00788j), 2023-12-13
Supplement: d3ma00788j1.pdf [file d3ma00788j1.pdf]

## Supporting Information

### **High-temperature ternary Cu-Si-Al alloy as a core-shell microencapsulated phase change material: Fabrication via dry synthesis method and its thermal stability mechanism**

Masahiro Aoki<sup>a</sup>, Melbert Jeem<sup>b</sup>, Yuto Shimizu<sup>c</sup>, Takahiro Kawaguchi<sup>c</sup>, Minako Kondo<sup>b</sup>, Tomokazu

Nakamura<sup>b</sup>, Chihiro Fushimi<sup>d</sup>, and Takahiro Nomura<sup>b\*</sup>

<sup>a</sup>Graduate School of Bio-Applications and Systems Engineering, Tokyo University of Agriculture and Technology, 2-24-16, Naka-cho, Koganei, Tokyo, 184-8588, Japan

<sup>b</sup>Faculty of Engineering, Hokkaido University, Kita 13 Nishi 8, Kita-ku, Sapporo, 060-8628 Japan

<sup>c</sup>Graduate School of Engineering, Hokkaido University, Kita 13 Nishi 8, Kita-ku, Sapporo, 060-8628 Japan

<sup>d</sup>Department of Chemical Engineering, Tokyo University of Agriculture and Technology, 2-24-16, Naka-cho, Koganei, Tokyo 184-8588, Japan

\*Corresponding author

Tel.: +81 11 706 6842; fax: +81 11 706 6849

E-mail address: nms-tropy@eng.hokudai.ac.jp (T. Nomura)

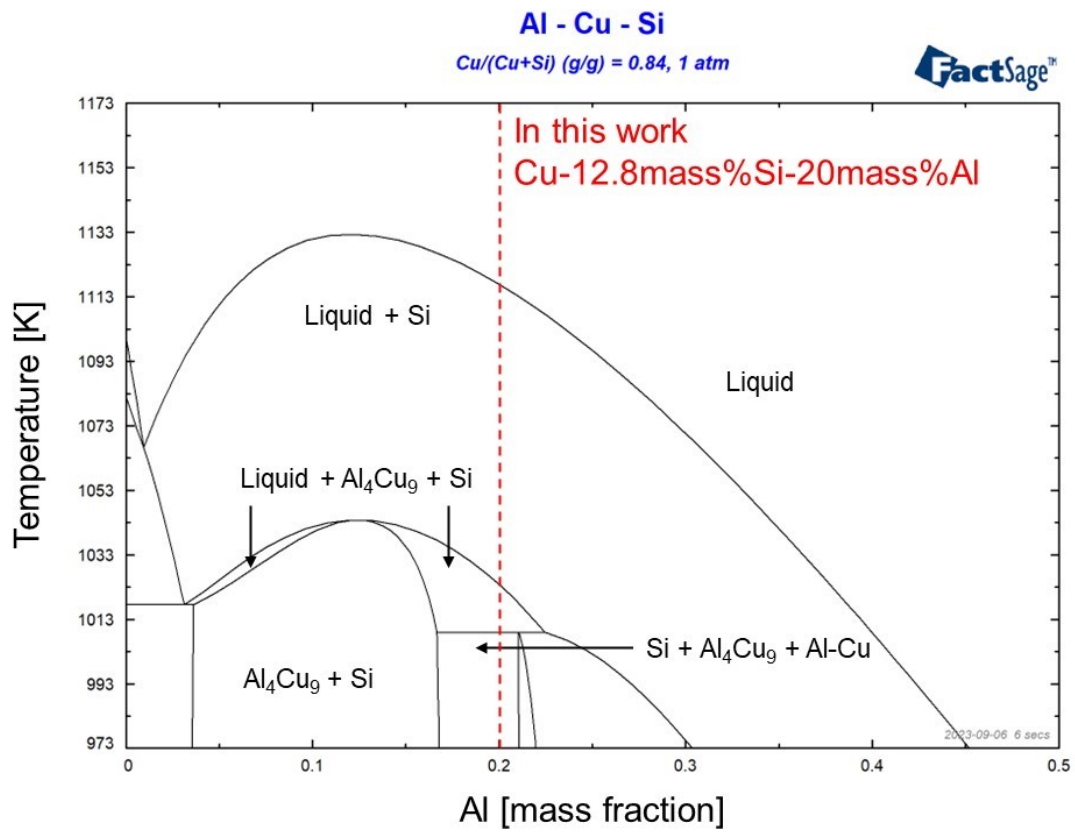

**Figure S1.** Cu-Si-Al based alloy phase diagram calculated by FactSage 8.2.

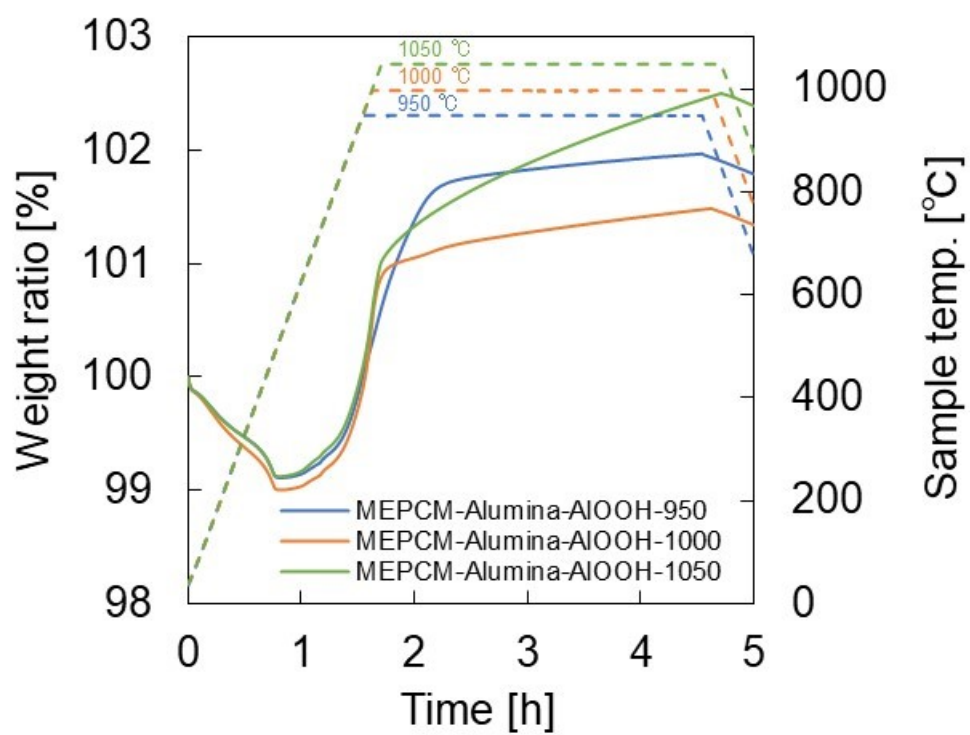

**Figure S2.** Thermogravimetric (TG) curves during heat-oxidation treatment of MEPCM-Alumina-AIOOH at 950 °C, 1000 °C, and 1050 °C for three hours in an O<sub>2</sub> environment.

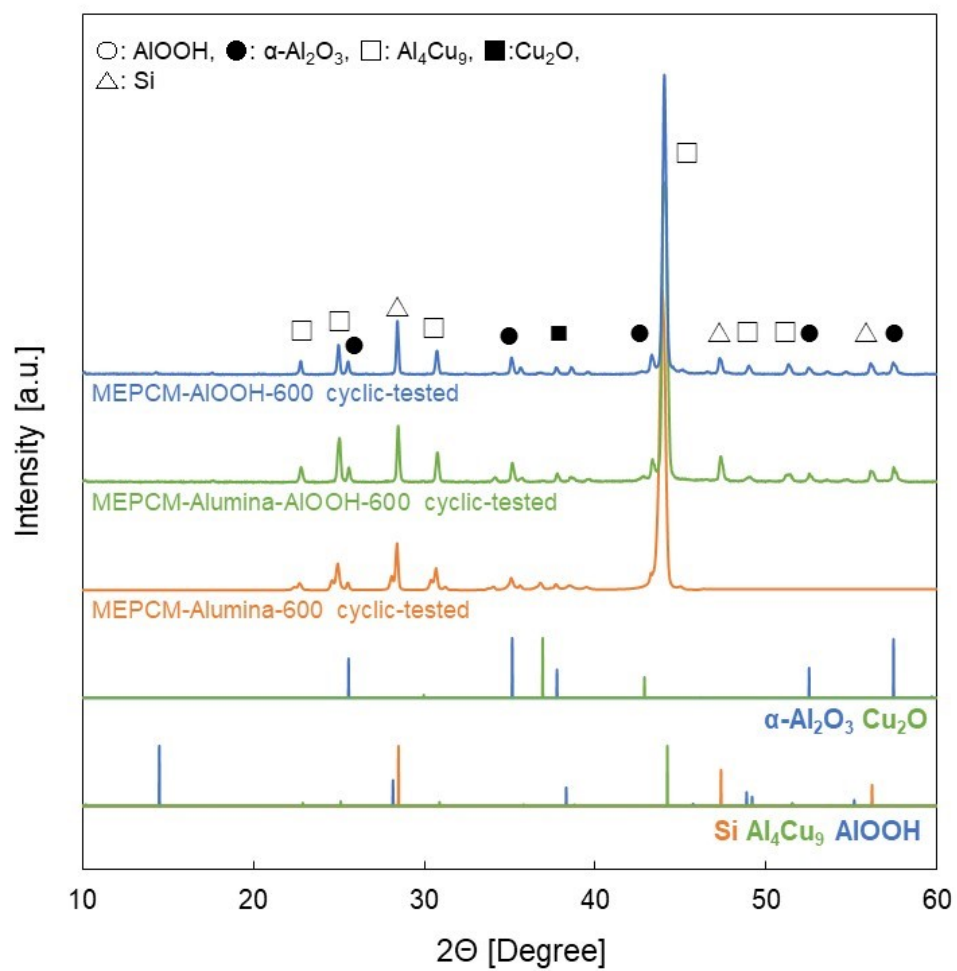

**Figure S3.** X-ray diffraction (XRD) patterns of MEPCM after 600 cyclic tests.

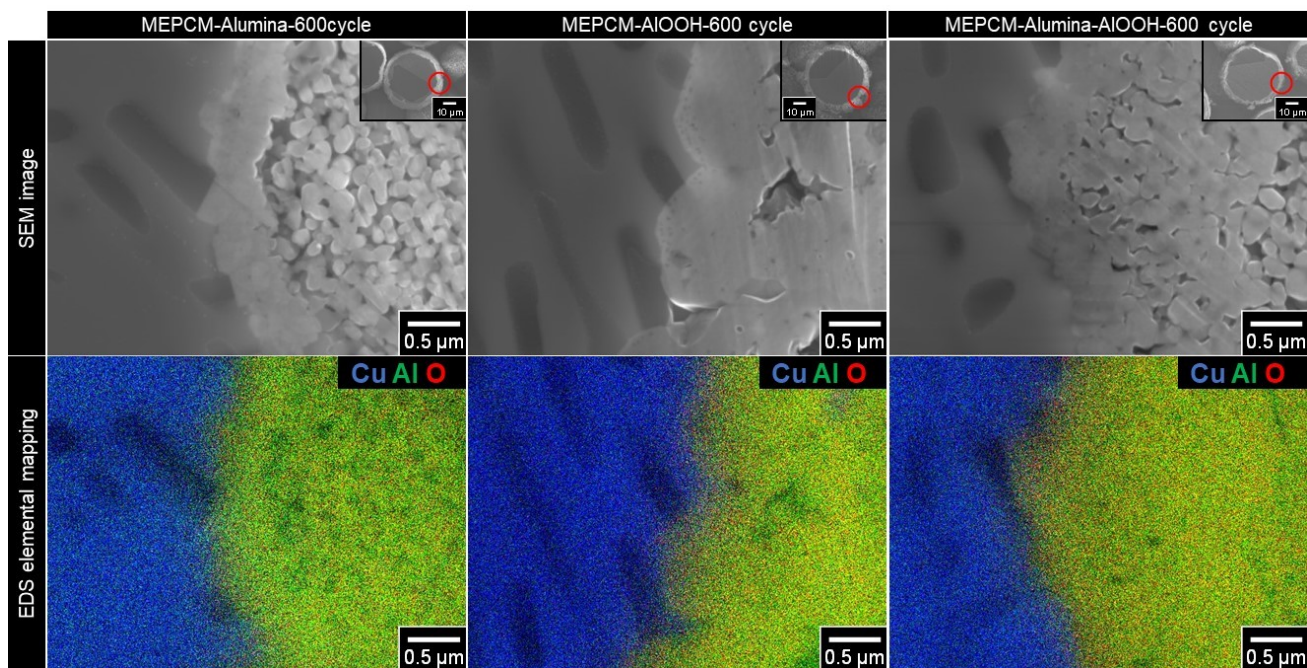

**Figure S4.** SEM images and EDS elemental mapping after 600 cyclic tests.

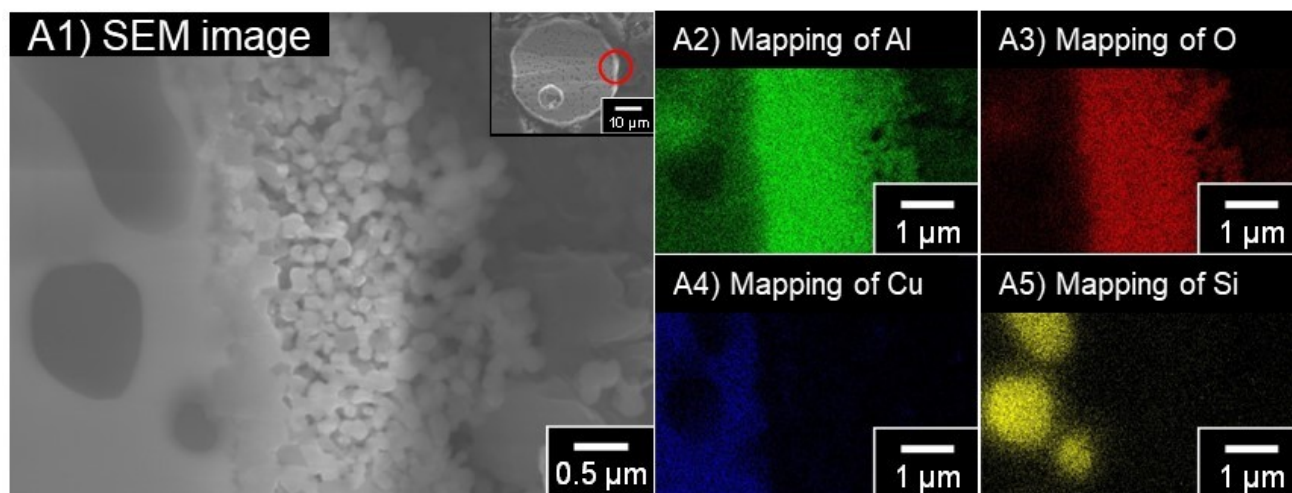

**Figure S5.** EDS elemental mapping of the cross-section of MEPCM-Alumina.

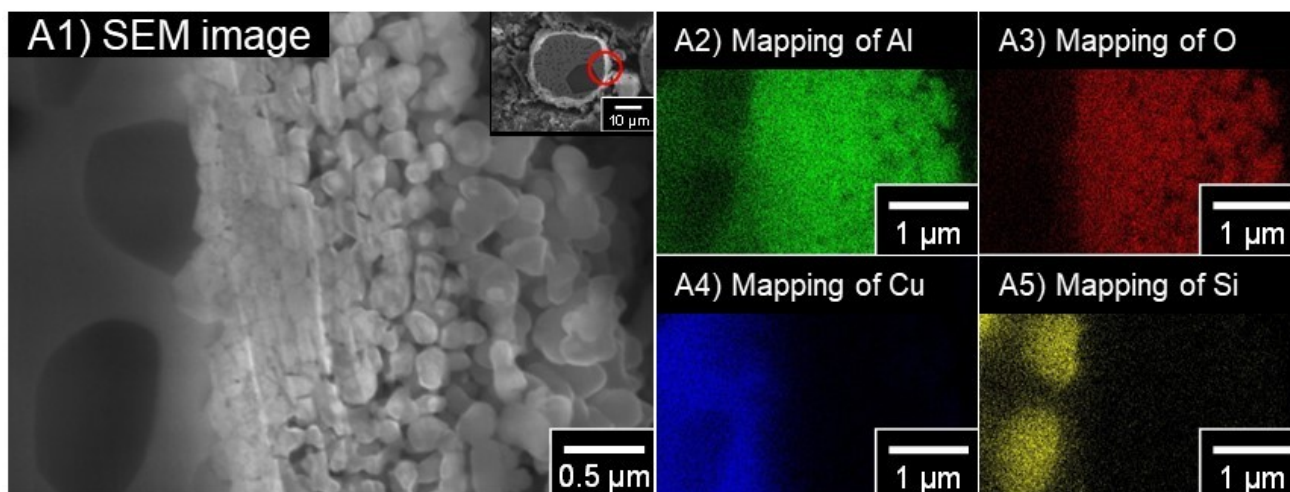

**Figure S6.** EDS elemental mapping of the cross-section of MEPCM-Alumina-AlOOH.

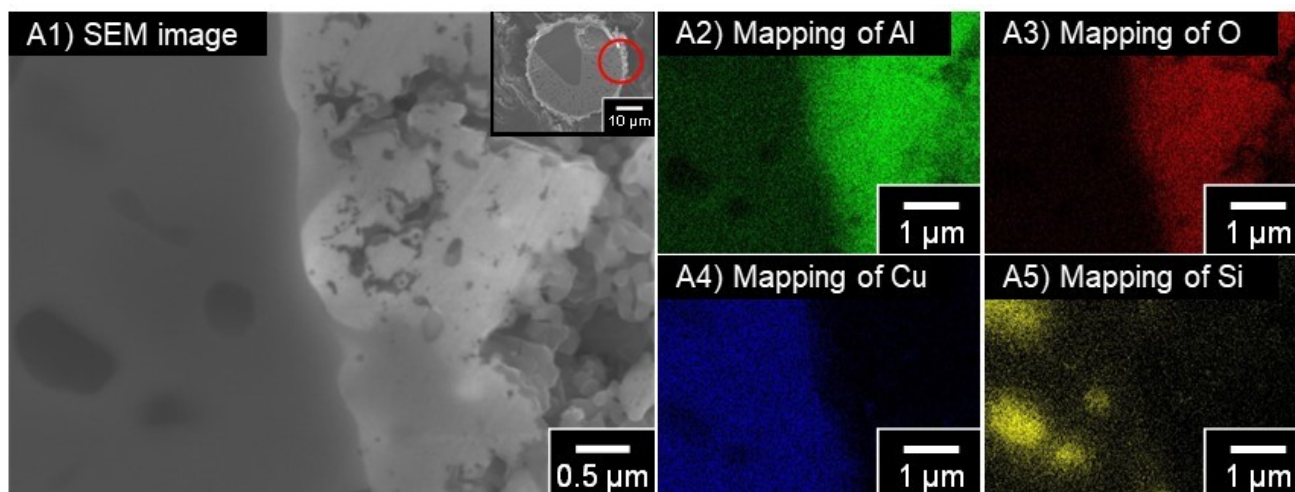

**Figure S7.** EDS elemental mapping of the cross-section of MEPCM-AlOOH.
